# Supplementary material
Source: PubMed Central journal article supplement (PMC5733142)
Supplement: NIHMS924386-supplement-Supp_Table_2.pdf [file NIHMS924386-supplement-Supp_Table_2.pdf]

**Supporting Information Table-2: List of antibodies used for immunoblot and immunofluorescence studies.** The working concentration for western blot is indicated. For immunofluorescence the antibody dilution as well as fixative used and permeabilization conditions are listed.

| <b>Ab Name</b>      | <b>Company</b>    | <b>Catalog #</b> | <b>stock<br/>(mg/ml)</b> | <b>50% glycerol<br/>(mg/ml)</b> | <b>Dilution WB</b> | <b>WB (mg/ml)</b> | <b>IF dilution</b> | <b>SR dilution</b> | <b>Fixative</b> | <b>Permeabilization</b> |
|---------------------|-------------------|------------------|--------------------------|---------------------------------|--------------------|-------------------|--------------------|--------------------|-----------------|-------------------------|
| <b>ERICH3</b>       | Atlas antibodies  | HPA028655        | 0.1                      | 0.05                            | 1:1000             | 0.05              | 1:500              | 1:1000             | PFA/MetOH       | 0.1% Triton             |
| <b>ERICH3</b>       | Santa Cruz BT.    | SC-245591        | 0.2                      | 0.1                             | 1:1000             | 0.1               | 1:250              | 1:500              | PFA/MetOH       | 0.1% Triton             |
| <b>CFAP77</b>       | Atlas antibodies  | HPA021329        | 0.1                      | 0.05                            | 1:4000             | 0.0125            | 1:500              | 1:1000             | PFA             | 0.1% Triton             |
| <b>SPACA9</b>       | Atlas antibodies  | HPA022243        | 0.2                      | 0.1                             | 1:1000             | 0.1               | 1:500              | 1:1000             | PFA             | NO                      |
| <b>C1orf87</b>      | Atlas antibodies  | HPA031366        | 0.05                     | 0.025                           | 1:500              | 0.05              | 1:500              | 1:1000             | PFA/MetOH       | 0.1% Triton             |
| <b>CCDC181</b>      | Atlas antibodies  | HPA027189        | 0.2                      | 0.1                             | 1:2000             | 0.1               | 1:500              | 1:1000             | PFA/MetOH       | 0.1% Triton             |
| <b>CCDC173</b>      | Atlas antibodies  | HPA042995        | 0.2                      | 0.1                             | 1:1000             | 0.1               | 1:500              | 1:1000             | PFA             | 0.1% Triton             |
| <b>CFAP61</b>       | Atlas antibodies  | HPA009079        | 0.1                      | 0.05                            | 1:1000             | 0.05              | 1:100              | 1:500              | PFA             | 0.1% Triton             |
| <b>CCDC17</b>       | Atlas antibodies  | HPA028338        | 0.1                      | 0.1                             | 1:1000             | 0.1               | 1:500              | 1:1000             | PFA             | 0.1% Triton             |
| <b>Ac-TUBULIN</b>   | Sigma             | T7451            | 1.1                      | 0.55                            | NT                 | NT                | 1:250/1:100        | 1:2000             | PFA/MetOH       | 0.1% Triton             |
| <b>γ-TUBULIN</b>    | Sigma             | T6557            | 1.1                      | 0.55                            | NT                 | NT                | 1:50               | NT                 | PFA             | 0.1% Triton             |
| <b>EZRIN</b>        | Transduction Lab. | 610602           | 0.25                     | 0.125                           | NT                 | NT                | 1:300              | 1:500              | PFA             | 0.1% Triton             |
| <b>CALRETICULIN</b> | Thermo Fisher     | PA3-900          | NP                       | NP                              | 1:1000             | NP                | 1:500              | NT                 | NT              | NT                      |

**NP:** Not provided by company

**NT:** Not tested
