# Supplementary material
Source: PubMed Central journal article supplement (PMC5733142)
Supplement: NIHMS924386-supplement-Supp_Table_3.pdf [file NIHMS924386-supplement-Supp_Table_3.pdf]

**Supporting Information Table-3. Primer sequences used for RT-PCR**

| <b>Name</b>           | <b>Primer Sequence</b>                                     | <b>PCR product size (bp)</b> |
|-----------------------|------------------------------------------------------------|------------------------------|
| <b><i>ERICH3</i></b>  | F: GGG AAGAAAGCACTGCTCAGGTG<br>R: GCTTGTCCTATGGGGTCTGACC   | 471                          |
| <b><i>C1orf87</i></b> | F: ACTGAGAGTCATGGCACTCATAGC<br>R: TTTGAGACATCTCGGGGACTTC   | 420                          |
| <b><i>CFAP77</i></b>  | F: ACATCCGTTCCGGGCATGGAGAA<br>R: TTAATGCTCTCTGGCGATCGGC    | 777                          |
| <b><i>SPACA9</i></b>  | F: TGAGGTGAAAGAATCCCTTCGC<br>R: GCTGGCTTTTGTGAGCTGTCTA     | 607                          |
| <b><i>CCDC181</i></b> | F: TGGACAAGAAGATGTGCTCC<br>R: CTTTCATCTGCTCTTCGTGC         | 698                          |
| <b><i>CCDC173</i></b> | F: TGAAAGAACGTGATGCCAG<br>R: CGTTTCTCCATAAGCCTGTGTG        | 481                          |
| <b><i>CFAP61</i></b>  | F: CAAGCAGGATGACTGGGTGT<br>R: CCAAGCTCCTACTGCTGACA         | 860                          |
| <b><i>CCDC17</i></b>  | F: CGGCGAGAGGCAGAACTTTA<br>R: TCCTTCCTGTATCCCGTCCA         | 619                          |
| <b><i>DNAI1</i></b>   | F: AGAGAAGGAGAAGGCAAAGACCCC<br>R: TGTACTCAGGGAAGCTGGGGTTCT | 400                          |
| <b><i>PPIA</i></b>    | F: CCGTGTTCTTCGACATTGCC<br>R: ACACCACATGCTTGCCATCC         | 371                          |
