# Supplementary material
Source: PubMed Central journal article supplement (PMC5733142)
Supplement: NIHMS924386-supplement-Supp_Table_6.pdf [file NIHMS924386-supplement-Supp_Table_6.pdf]

**Supporting Information Table-6: Quantification of positive cells.** Cells were immunostained to visualize each protein of interest. Ciliated and non-ciliated cells were counted and the percentage of positive cells was calculated.

| <b>Protein name</b> | <b>Total # of cell counted</b> | <b>Number of ciliated cells</b> | <b>Number of non-ciliated cells</b> | <b>Positive of ciliated cells (%)</b> | <b>Positive non-ciliated cells (%)</b> |
|---------------------|--------------------------------|---------------------------------|-------------------------------------|---------------------------------------|----------------------------------------|
| <b>ERICH3</b>       | 103                            | 66                              | 37                                  | 100                                   | 0                                      |
| <b>CFAP77</b>       | 80                             | 49                              | 31                                  | 100                                   | 0                                      |
| <b>SPACA9</b>       | 112                            | 53                              | 59                                  | 100                                   | 0                                      |
| <b>C1orf87</b>      | 98                             | 50                              | 43                                  | 100                                   | 0                                      |
| <b>CCDC181</b>      | 100                            | 40                              | 60                                  | 100                                   | 0                                      |
| <b>CCDC173</b>      | 109                            | 58                              | 51                                  | 100                                   | 0                                      |
| <b>CFAP61</b>       | 67                             | 33                              | 34                                  | 100                                   | 0                                      |
| <b>CCDC17</b>       | 104                            | 47                              | 57                                  | 100                                   | 0                                      |
