# Supplementary material
Source: PubMed Central journal article supplement (PMC5733142)

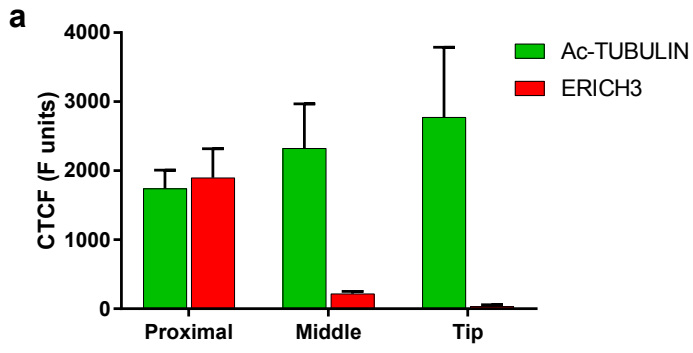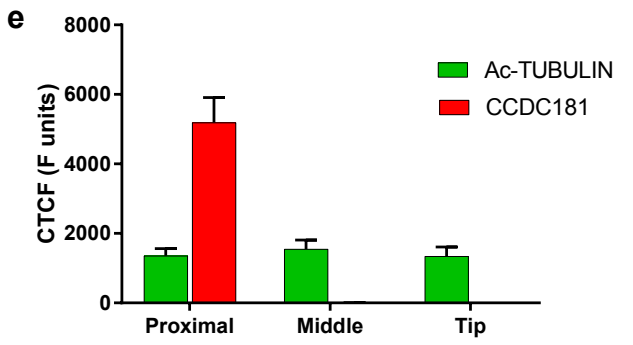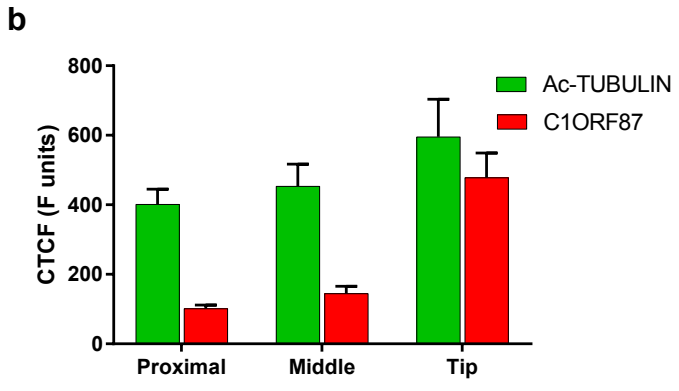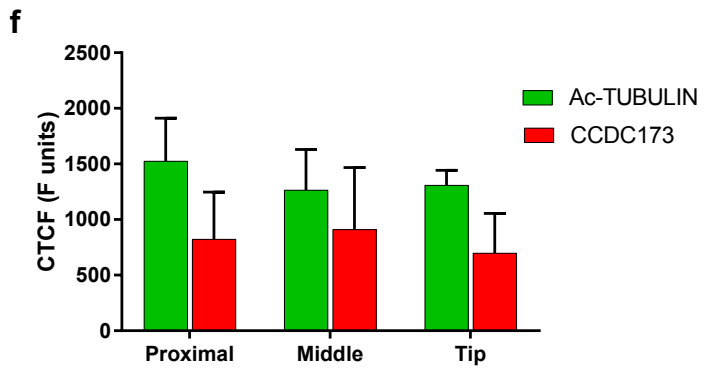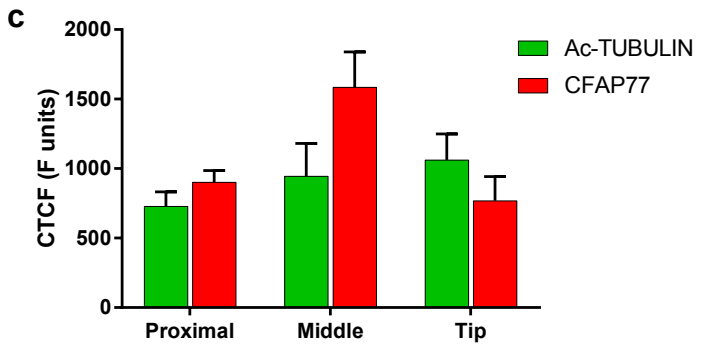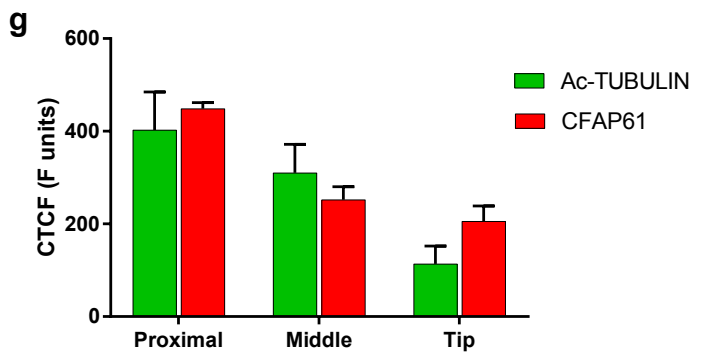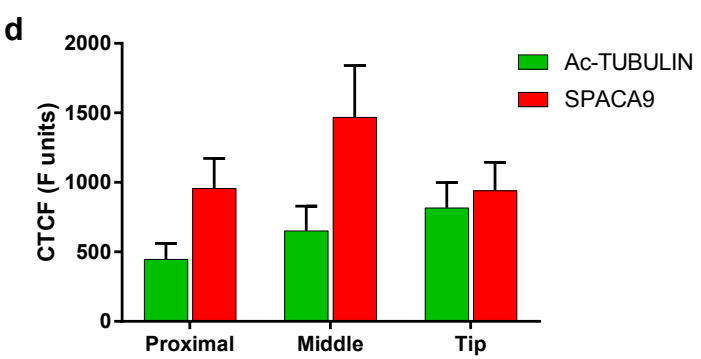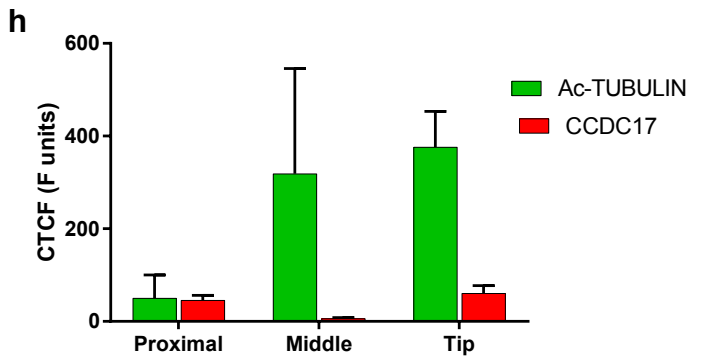

Supplement: NIHMS924386-supplement-Supp_Fig_3.pdf [file NIHMS924386-supplement-Supp_Fig_3.pdf]
